# Supplementary material for: AlphaFold2 and CryoEM: Revisiting CryoEM modeling in near-atomic resolution density maps
Source: PubMed Central journal article supplement (PMC9207676; doi:10.1016/j.isci.2022.104496), 2022-05-30
Supplement: mmc1.pdf [file mmc1.pdf]

**iScience, Volume 25**

**Supplemental information**

**AlphaFold2 and CryoEM: Revisiting CryoEM modeling  
in near-atomic resolution density maps**

**Corey F. Hryc and Matthew L. Baker**

A.

| Sequence length (candidate) | Sequence                                                                                                                                  |
|-----------------------------|-------------------------------------------------------------------------------------------------------------------------------------------|
| 111                         | MKTVNMKTGTDSFVGEDGKPETKDQYPWGLRITLDNESLQRLGLNAKSLPAV<br>GDSVSVMAMANVCSVSTRRTDHDGEDNYVELQITDIGLAPQKRDDAKELKDAFY<br>PDGEDD                  |
| 112                         | MAKSPAERKAAQRARQYAAGERKLELVLDGQELEMLARNCTARRHGRAPYD<br>MSEYIALLIRQDDARVRGRIKSISANRCGKCGDSLVPKSCPCDGD SACWVTRG<br>WHETKLSV                 |
| 121                         | MSDKDIESEIQAKGLTAPRVTPQRIESIIASEHYFTAQDGVIGSQYCHIPNGEISV<br>GPHSLDLLTFCVMTLANGFTVTGESACASPENFDAEIGRKIARENAVNKIWMLE<br>GYLLKQKLSEQ         |
| 130                         | MLLDQQALFSAAQAITATAVSTNVIDTGSSKDVGKYGDIPLLIQVVEAFNTLTSLT<br>VTVQTDDNSSFSATDVISMVIPLASLTVGYKTPVITLPMKLERYIRLNYTVTGTA<br>PTTGKVTAGIVGGVQTNV |

B.

| Sequence length (candidate) | 111 | 112  | 121   | 130   |
|-----------------------------|-----|------|-------|-------|
| 111                         |     | 5.5% | 7.6%  | 14.6% |
| 112                         |     |      | 22.3% | 15.6% |
| 121                         |     |      |       | 10.9% |

**Figure S1. GP10 candidate sequences.** Related to Figure 3. Four ~12kDa sequences were identified as potential candidate proteins for the gp10 density. The sequences are shown in (A). (B) Pairwise alignments among the four sequences show little sequence identity.

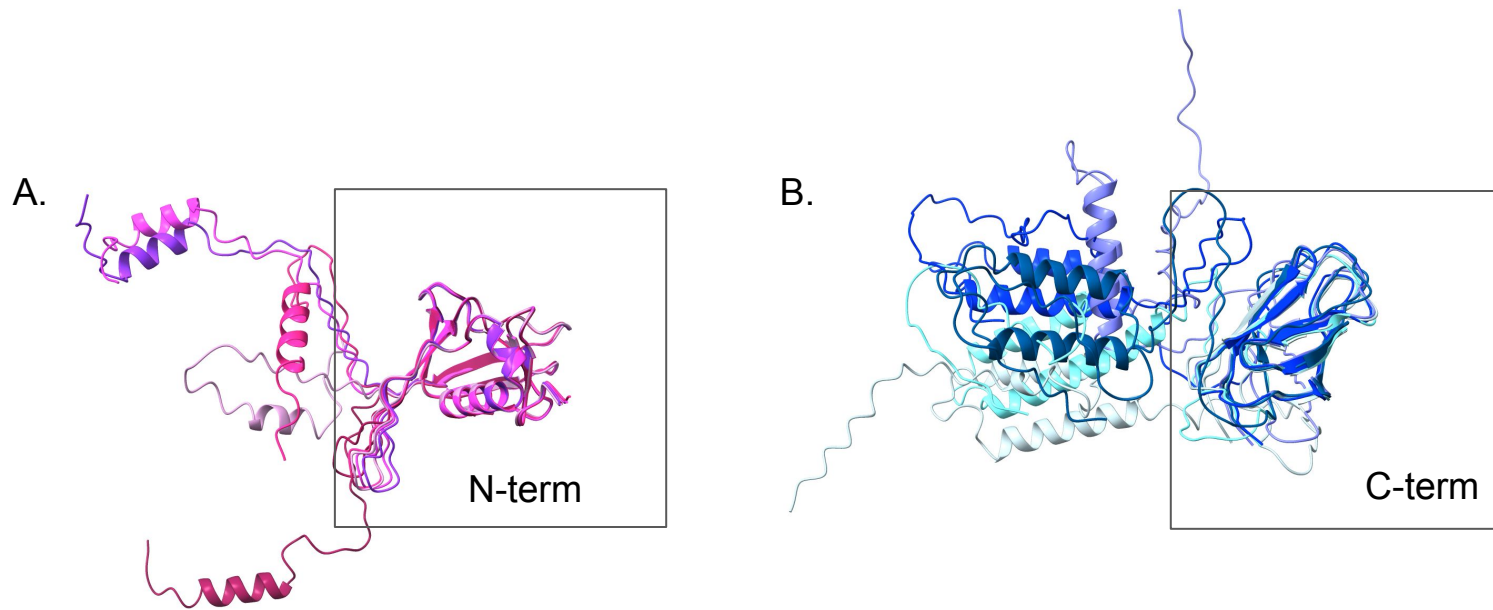

**Figure S2. AlphaFold2 model of gp55 and gp58 in Syn5.** Related to Figure 5. Five AlphaFold2 models were generated for gp55 (A) and gp58 (B). Models for gp55 were aligned to each other; each model is colored in a shape of pink or purple in (A). Models for gp58 were aligned to each other; each model is colored in a shape of pink or purple in (B).

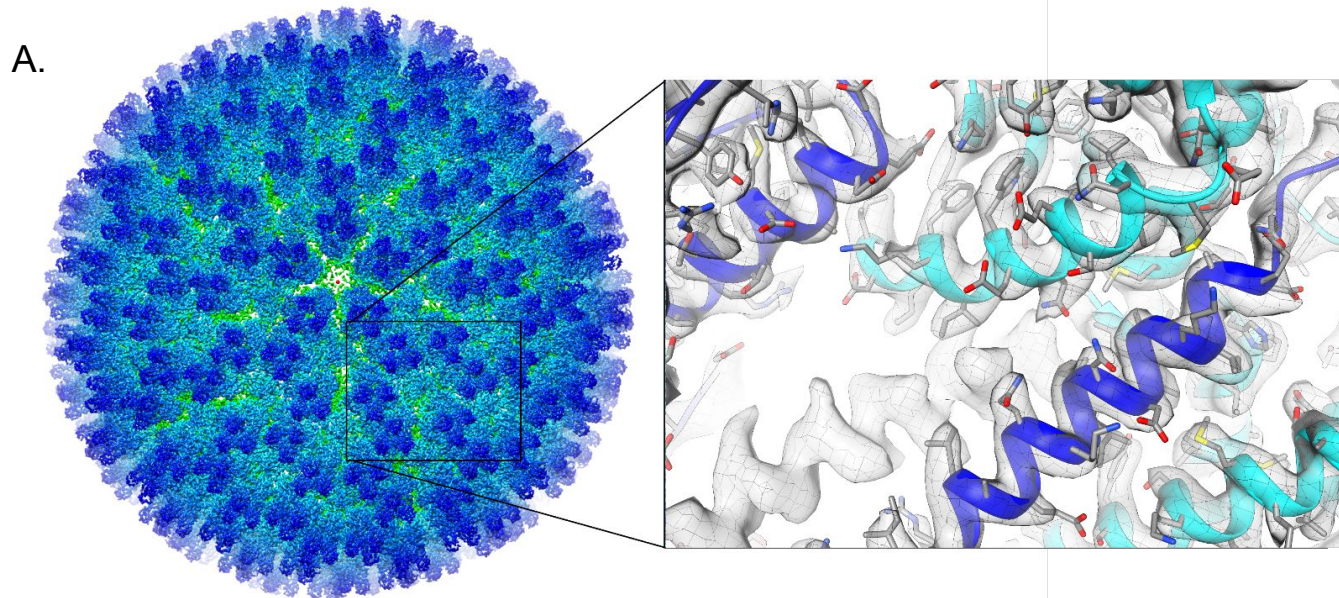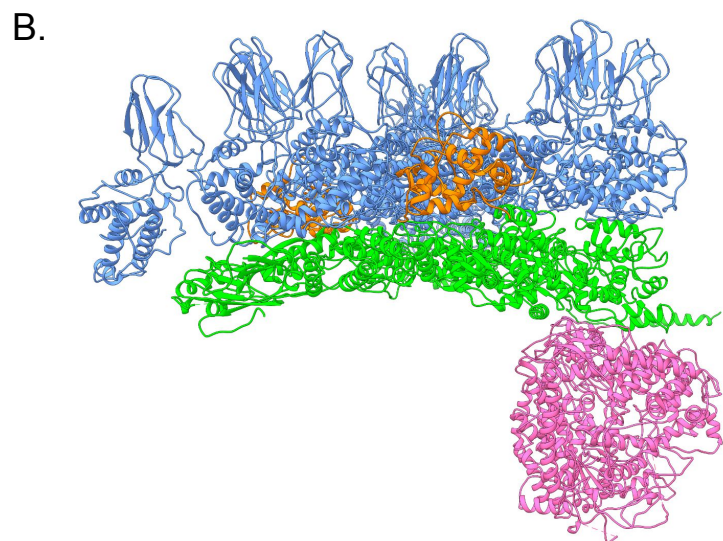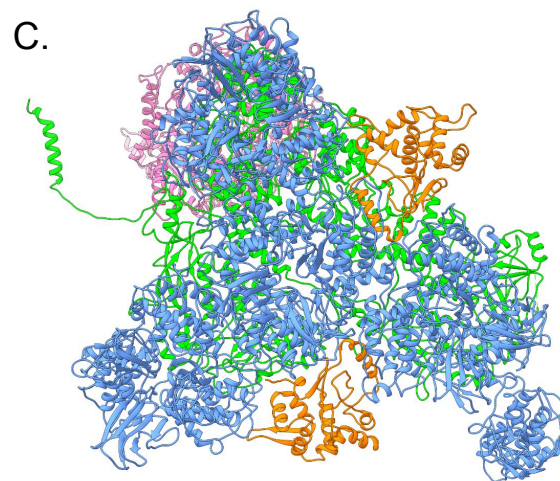

**Figure S3. Density map and model of MCRV.** Related to Figure 6. (A) The MCRV cryoEM density map is shown colored radially. A zoomed in view of the capsid reveals high-resolution features and the corresponding model. An asymmetric unit from MCRV is shown in a side view (B) and a top view (C). In this figure, VP11 is shown in orange, VP12 is shown in purple, VP3 is shown in green and the RdRP is shown in bright pink.

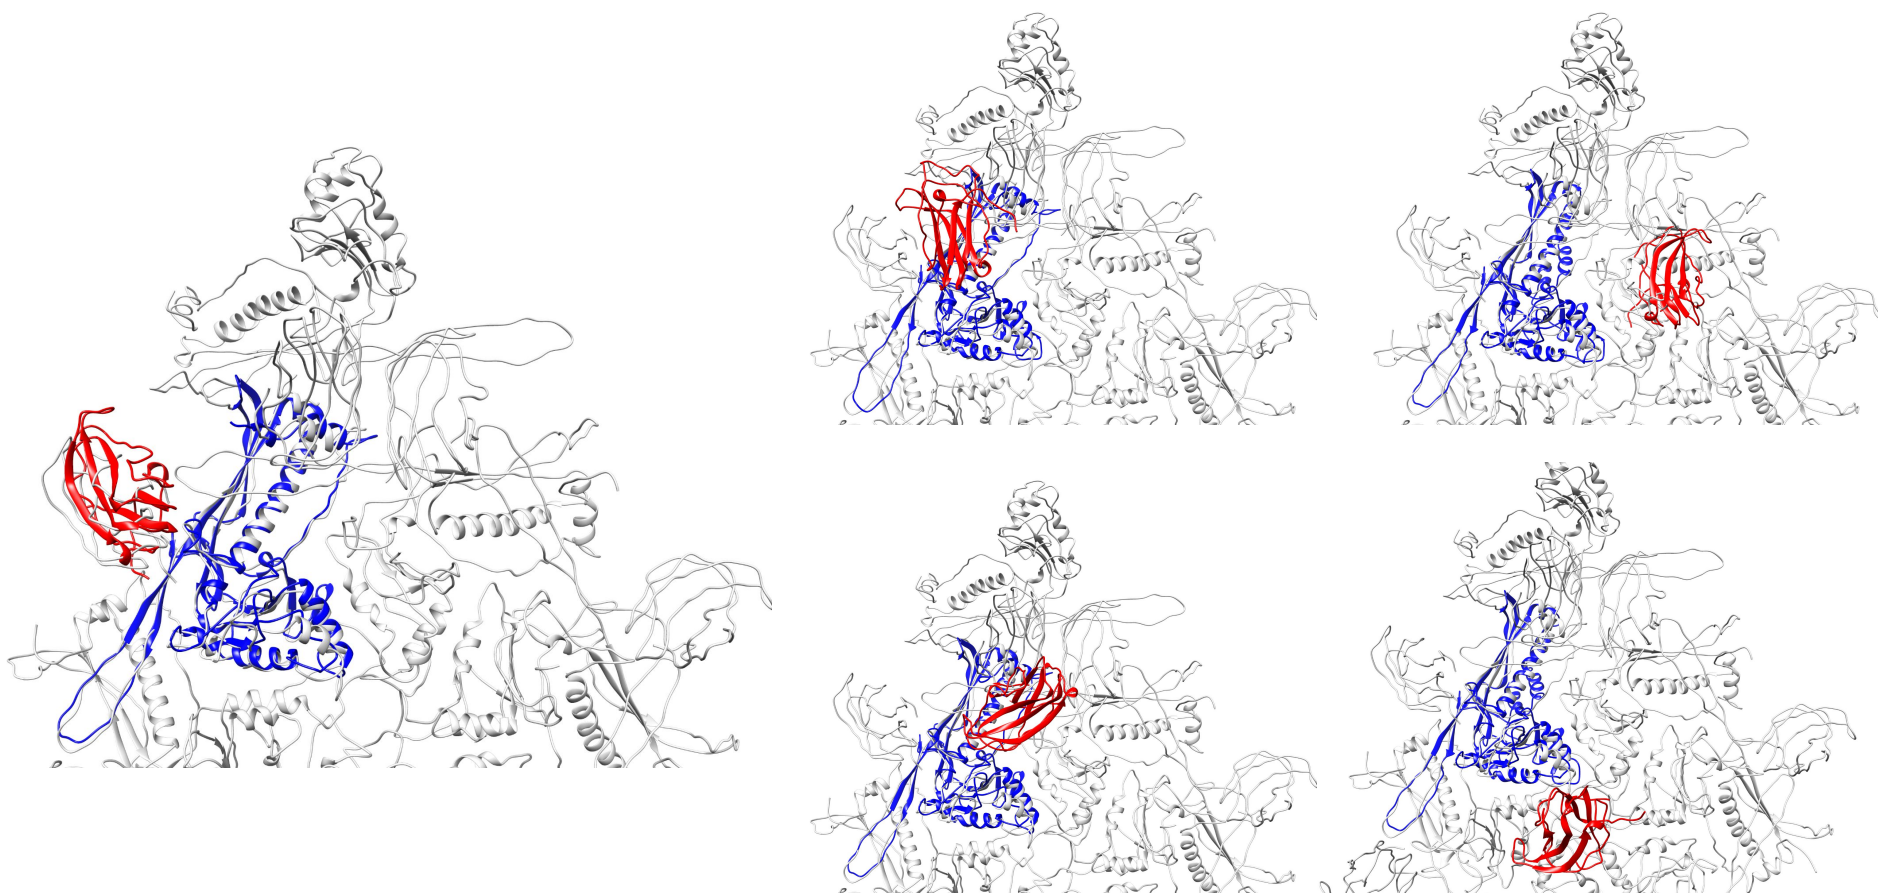

**Figure S4. AlphaFold2 model of a gp7/gp10 complex.** Related to Figure 2 and 3. Five AlphaFold2 models for a gp7/gp10 complex are shown with gp7 in blue and gp10 in red. The experimentally derived models for gp7 and gp10 in a hexon are shown in grey. Of the five AlphaFold2 models, only one (left) positioned gp7 and gp10 close to the experimentally determined positions.



A.

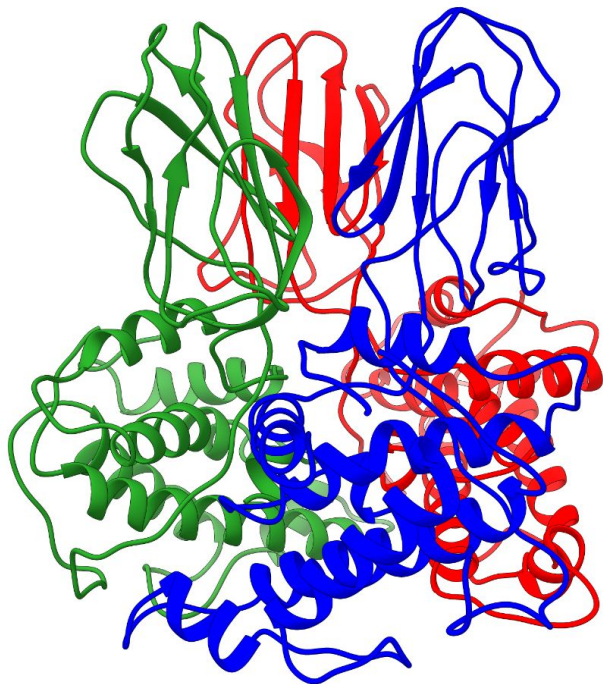

B.

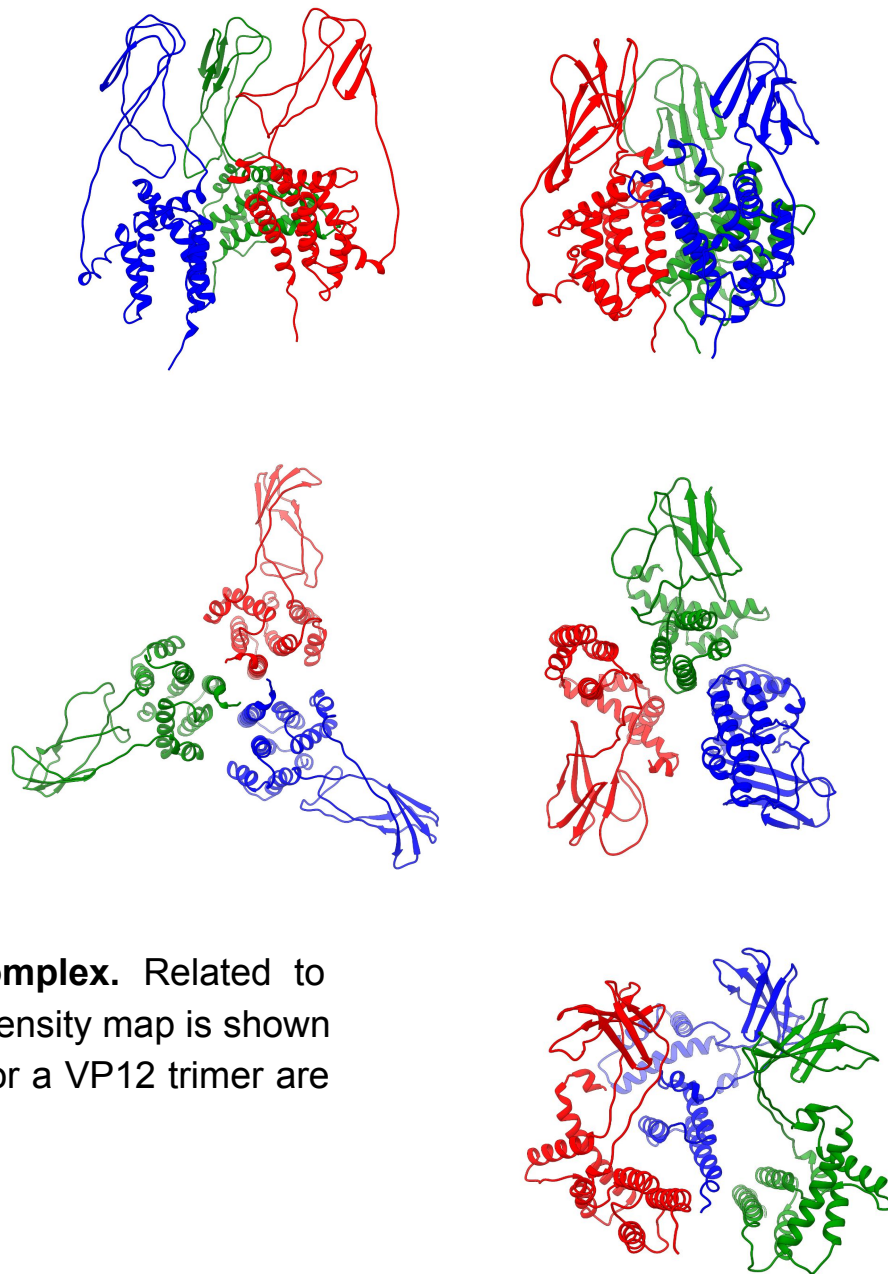

**Figure S5. AlphaFold2 models for a VP12 complex.** Related to Figure 6. (A) A VP12 trimer model derived from the density map is shown colored by chain. (B) The five AlphaFold2 models for a VP12 trimer are shown colored by chain.
